# Supplementary material for: Effect of acute high-intensity exercise on myocardium metabolic profiles in rat and human study via metabolomics approach
Source: PubMed Central journal article supplement (PMC9042871; doi:10.1038/s41598-022-10976-5), 2022-04-26
Supplement: 41598_2022_10976_MOESM1_ESM.pdf [file 41598_2022_10976_MOESM1_ESM.pdf]

## Supplementary information

### Effect of Acute High-Intensity Exercise on Myocardium Metabolic Profiles in Rat and Human Study via Metabolomics Approach

Lijun Wu<sup>1</sup>, Jiayi Wang<sup>1\*</sup>, Xiuhui Cao<sup>1</sup>, Yue Tian<sup>1</sup>, Jia Li<sup>1</sup>

<sup>1</sup> School of Physical Education, Shanxi University, Taiyuan, Shanxi, China.

\* Corresponding author: Jiayi Wang, School of Physical Education, Shanxi University, NO. 92, Wucheng Road, Taiyuan, Shanxi, China, 030006. Email: [2458349847@qq.com](mailto:2458349847@qq.com).

#### Table of contents

##### Supplementary Tables

| Page | Supplementary Table | Description                                                                                                                                                      |
|------|---------------------|------------------------------------------------------------------------------------------------------------------------------------------------------------------|
| 2    | S1                  | Basic information of participants involved in this study.                                                                                                        |
| 2    | S2                  | Summary of LC/MS analysis identified metabolites in rat myocardial samples from group C and Group E.                                                             |
| 5    | S3                  | Summary of <sup>1</sup> H-NMR analysis identified metabolites in subject serum samples from group E1 and group E2.                                               |
| 6    | S4                  | PLS-DA analysis model parameter table                                                                                                                            |
| 6    | S5                  | OPLS-DA analysis model parameter table                                                                                                                           |
| 6    | S6                  | Differential metabolite pathway analysis results obtained through Met-PA                                                                                         |
| 8    | S7                  | KEGG ID of potential metabolic markers ( <a href="http://www.genome.jp/kegg/compound/">http://www.genome.jp/kegg/compound/</a> ) <sup>[52]</sup> <sup>[53]</sup> |

##### Supplementary Figures

| Page | Supplementary Figure | Description                                                                                                                                    |
|------|----------------------|------------------------------------------------------------------------------------------------------------------------------------------------|
| 9    | S1                   | Overlapping TIC spectra of negative and positive ion modes of QC samples                                                                       |
| 9    | S2                   | Hotelling's T2 diagram in negative and positive ion mode of the sample                                                                         |
| 9    | S3                   | Acute high-intensity exercise metabolic pathways constructed by Met-PA database                                                                |
| 10   | S4                   | Assessment of the diagnostic power of receiver operating characteristic curves for the differential metabolites acute high-intensity exercise. |

**Table S1****Basic information of participants involved in this study.**

|          | Age        | Height (m) | Weight (kg) | BMI        | 100m result (s) |
|----------|------------|------------|-------------|------------|-----------------|
| Subjects | 19.06±0.60 | 1.76±0.03  | 69.30±1.50  | 21.89±0.97 | 12.6±0.2        |

**Table S2****Summary of LC/MS analysis identified metabolites in rat myocardial samples from group C and Group E.****A. Positive ion mode**

| Name        | Metabolite                                              | rt (s)   | m/z     |
|-------------|---------------------------------------------------------|----------|---------|
| M120T151    | Tyramine                                                | 150.693  | 120.079 |
| M258T224    | 5-Methylcytidine                                        | 224.143  | 258.107 |
| M293T431_2  | EDTA                                                    | 430.529  | 293.096 |
| M250T94     | Adenosine                                               | 93.599   | 250.092 |
| M337T195_2  | MG (18:2(9Z,12Z)/0:0/0:0) [rac]                         | 194.661  | 337.272 |
| M298T95     | S-Methyl-5'-thioadenosine                               | 94.521   | 298.096 |
| M245T412    | Pro-Glu                                                 | 411.7275 | 245.113 |
| M380T390    | S-Lactoylglutathione                                    | 389.698  | 380.110 |
| M332T415    | 2'-Deoxyadenosine 5'monophosphate (dAMP)                | 414.587  | 332.073 |
| M786T396    | Flavin adenine dinucleotide (FAD)                       | 396.179  | 786.160 |
| M811T51     | 1-Stearoyl-2-oleoyl-sn-glycerol 3-phosphocholine (SOPC) | 50.791   | 810.599 |
| M112T205_2  | Cytosine                                                | 204.739  | 112.050 |
| M231T423    | Pro-Asp                                                 | 422.550  | 231.097 |
| M282T275    | N6-methyladenosine                                      | 274.921  | 282.119 |
| M84T367_2   | 1-Aminocyclopropanecarboxylic acid                      | 367.269  | 84.044  |
| M152T227    | 2-Hydroxyadenine                                        | 227.419  | 152.055 |
| M504T193    | 1-Eicosatrienoyl-sn-glycero-3-phosphoethanolamine       | 193.391  | 504.302 |
| M231T435    | Dihydroxyacetone phosphate                              | 435.3    | 231.025 |
| M613T492    | Glutathione disulfide                                   | 492.361  | 613.158 |
| M537T215    | Allopurinol riboside                                    | 214.962  | 537.167 |
| M228T205    | Deoxycytidine                                           | 204.742  | 228.097 |
| M269T215    | Inosine                                                 | 214.962  | 269.087 |
| M147T367_2  | L-Pyroglutamic acid                                     | 367.150  | 147.076 |
| M201T391    | D-Erythrose 4-phosphate                                 | 391.191  | 201.014 |
| M126T291_2  | Taurine                                                 | 291.211  | 126.022 |
| M345T485    | Thiamine monophosphate                                  | 485.36   | 345.077 |
| M90T343_2   | L-Alanine                                               | 342.775  | 90.054  |
| M524T186_18 | 1-Stearoyl-2-hydroxy-sn-glycero-3-phosphocholine        | 185.966  | 524.369 |
| M244T237    | Cytidine                                                | 237.101  | 244.093 |
| M496T216    | 1-Palmitoyl-sn-glycero-3-phosphocholine                 | 216.48   | 496.336 |
| M759T124    | Thioetheramide-PC                                       | 124.188  | 758.568 |
| M341T154    | 1-Stearoyl-rac-glycerol                                 | 153.975  | 341.303 |
| M121T111    | Purine                                                  | 111.126  | 121.049 |
| M156T485    | L-Histidine                                             | 484.903  | 156.075 |
| M132T343_3  | Creatine                                                | 342.775  | 132.076 |

|            |                                               |         |         |
|------------|-----------------------------------------------|---------|---------|
| M787T141   | 1,2-dioleoyl-sn-glycero-3-phosphatidylcholine | 140.515 | 786.598 |
| M277T459   | gamma-L-Glutamyl-L-glutamic acid              | 459.410 | 277.102 |
| M184T468_5 | Phosphorylcholine                             | 468.045 | 184.073 |
| M162T409   | L-Carnitine                                   | 409.250 | 163.111 |
| M176T385   | L-Citrulline                                  | 385.268 | 176.102 |
| M123T457   | Nicotinamide                                  | 456.87  | 123.054 |
| M400T169   | L-Palmitoylcarnitine                          | 169.317 | 400.340 |
| M171T471   | Glyceraldehyde 3-phosphate                    | 471.382 | 171.004 |
| M189T515   | N6, N6, N6-Trimethyl-L-lysine                 | 514.805 | 189.159 |
| M265T387   | Thiamine                                      | 387.128 | 265.113 |
| M170T374   | 3-Methylhistidine                             | 373.66  | 170.091 |
| M134T449   | L-Aspartate                                   | 449.359 | 134.044 |
| M213T441   | D-Ribulose 5-phosphate                        | 441.475 | 213.014 |
| M114T167_2 | Creatinine                                    | 166.775 | 114.065 |
| M219T461   | Vanillin                                      | 460.988 | 219.004 |
| M137T215_5 | Hypoxanthine                                  | 215.155 | 137.046 |
| M291T465   | Argininosuccinic acid                         | 465.233 | 291.129 |
| M735T176   | PC (16:0/16:0)                                | 175.564 | 734.564 |
| M426T226   | Cholic acid                                   | 225.515 | 426.318 |
| M278T472   | D-Glucose 6-phosphate                         | 472.02  | 278.061 |
| M259T415   | 6-Phospho-D-gluconate                         | 415.291 | 259.019 |
| M628T191   | 1-Stearoyl-2-arachidonoyl-sn-glycerol         | 190.834 | 627.530 |
| M308T399   | Glutathione                                   | 399.393 | 308.089 |
| M175T579   | L-Arginine                                    | 579.330 | 175.119 |
| M127T471   | Larixinic Acid                                | 471.296 | 127.038 |
| M109T453   | Quinone                                       | 452.725 | 109.027 |
| M203T483_2 | NG, NG-dimethyl-L-arginine (ADMA)             | 482.956 | 203.150 |
| M145T336_2 | L- (-) Sorbose                                | 335.610 | 145.049 |
| M508T484   | Adenosine 5'-triphosphate (ATP)               | 483.769 | 508     |
| M258T473   | Glycerophosphocholine                         | 473.364 | 258.108 |
| M428T166   | Stearoylcarnitine                             | 166.13  | 428.371 |
| M522T187_2 | 1-Oleoyl-sn-glycero-3-phosphocholine          | 187.149 | 522.352 |
| M522T447   | Maltotriose                                   | 447.474 | 522.2   |
| M147T552   | D-Pipecolinic acid                            | 551.623 | 147.112 |
| M261T472   | D-Mannose-6-phosphate                         | 471.89  | 261.036 |
| M112T366   | Histamine                                     | 366.495 | 112.086 |
| M136T209   | Adenine                                       | 208.667 | 136.06  |
| M245T334_5 | Arg-Ala                                       | 334.247 | 245.150 |
| M360T388   | 3.alpha. - Mannobiose                         | 387.904 | 360.147 |
| M399T512   | S-Adenosylmethionine                          | 512.254 | 399.141 |

## B. Negative ion mode

| Name       | Metabolite                                     | rt (s)  | m/z     |
|------------|------------------------------------------------|---------|---------|
| M180T124   | Acamprosate                                    | 124.399 | 180.033 |
| M242T237   | Cytidine                                       | 237.006 | 242.078 |
| M613T442   | Cytidine monophosphate-N-acetylneuraminic acid | 441.629 | 613.137 |
| M175T370   | D-galacturonic acid                            | 370.209 | 175.024 |
| M243T240   | Pseudouridine                                  | 240.384 | 243.062 |
| M145T368_2 | L-Glutamine                                    | 367.600 | 145.062 |

|            |                                                                      |         |         |
|------------|----------------------------------------------------------------------|---------|---------|
| M127T368 2 | Dihydrothymine                                                       | 367.610 | 127.051 |
| M241T98    | Thymidine                                                            | 98.07   | 241.082 |
| M611T492   | Glutathione disulfide                                                | 492.026 | 611.143 |
| M88T342 2  | L-Alanine                                                            | 341.941 | 88.04   |
| M464T183   | Glycocholic acid                                                     | 183.455 | 464.312 |
| M241T61    | Lumichrome                                                           | 60.688  | 241.073 |
| M339T431   | D-Fructose-1,6-bisphosphate                                          | 431.26  | 338.986 |
| M103T189   | D (-)-beta-hydroxy butyric acid                                      | 188.661 | 103.039 |
| M125T74    | Thymine                                                              | 73.773  | 125.035 |
| M369T436   | D-Ribulose 1,5-bisphosphate                                          | 436.2   | 368.998 |
| M131T373   | L-Asparagine                                                         | 372.781 | 131.045 |
| M151T217 2 | Xanthine                                                             | 216.596 | 151.026 |
| M229T437   | Dihydroxyacetone phosphate                                           | 436.812 | 229.012 |
| M117T389   | Succinate                                                            | 389.387 | 117.019 |
| M111T85 2  | Uracil                                                               | 85.016  | 111.02  |
| M104T372   | L-Serine                                                             | 372.413 | 104.034 |
| M267T69    | Hexadecanedioic acid                                                 | 68.536  | 267.195 |
| M187T103 2 | 3-Hydroxycapric acid                                                 | 102.738 | 187.133 |
| M295T63    | L-Arabinono-1,4-lactone                                              | 62.648  | 295.226 |
| M199T340   | 5-L-Glutamyl-L-alanine                                               | 339.909 | 199.069 |
| M132T450   | D-Aspartic acid                                                      | 450.009 | 132.029 |
| M277T45    | All cis-(6,9,12)-Linolenic acid                                      | 45.042  | 277.216 |
| M327T138   | (4Z,7Z,10Z,13Z,16Z,19Z)-<br>4,7,10,13,16,19-<br>Docosahexaenoic acid | 138.116 | 327.231 |
| M295T43    | 13(S)-HODE                                                           | 43.115  | 295.226 |
| M117T149   | 2-Methyl-3-hydroxybutyric acid                                       | 148.583 | 117.055 |
| M147T77    | D-Arabinono-1,4-lactone                                              | 76.925  | 147.029 |
| M407T225   | Cholic acid                                                          | 224.977 | 407.277 |
| M149T152 2 | L-Arabinose                                                          | 151.749 | 149.045 |
| M213T347   | 1-Deoxy-D-xylulose-5-phosphate                                       | 347.271 | 213.016 |
| M191T99    | D-Galactarate                                                        | 99.294  | 191.016 |
| M301T43    | Eicosapentaenoic Acid                                                | 43.083  | 301.215 |
| M465T25 2  | Cholesteryl sulfate                                                  | 25.455  | 465.303 |
| M124T291 2 | Taurine                                                              | 290.958 | 124.007 |
| M306T402   | Glutathione                                                          | 401.973 | 306.074 |
| M259T500   | D-Mannose 1-phosphate                                                | 500.028 | 259.021 |
| M271T44    | 16-Hydroxypalmitic acid                                              | 44.396  | 271.226 |
| M179T259 2 | D-Mannose                                                            | 258.625 | 179.055 |
| M227T103 3 | Myristic acid                                                        | 102.618 | 227.2   |
| M289T462   | D-Ribose 5-phosphate                                                 | 462.109 | 289.032 |
| M179T388 2 | myo-Inositol                                                         | 387.861 | 179.056 |
| M128T368 2 | Ammelide                                                             | 367.607 | 128.035 |
| M748T72    | 1-Palmitoyl-2-oleoyl-phosphatidylglycerol                            | 71.804  | 747.517 |
| M279T158   | Linoleic acid                                                        | 157.648 | 279.231 |
| M303T138   | Arachidonic Acid (Peroxide free)                                     | 137.76  | 303.231 |
| M134T206   | Adenine                                                              | 206.21  | 134.046 |
| M171T53 2  | Capric acid                                                          | 52.625  | 171.138 |
| M503T447   | Maltotriose                                                          | 447.351 | 503.158 |
| M255T46 1  | Palmitic acid                                                        | 45.689  | 255.233 |

|            |                                |         |         |
|------------|--------------------------------|---------|---------|
| M307T42    | 11(Z),14(Z)-Eicosadienoic Acid | 41.807  | 307.262 |
| M331T39    | Adrenic Acid                   | 39.015  | 331.262 |
| M133T406_2 | L-Malic acid                   | 406.150 | 133.014 |
| M257T394   | 6-Phospho-D-gluconate          | 393.683 | 257.005 |
| M199T449   | D-Erythrose 4-phosphate        | 449.261 | 199     |
| M227T412   | Phosphoenolpyruvate            | 411.837 | 226.996 |

**Table S3**

**Summary of <sup>1</sup>H-NMR analysis identified metabolites in subject serum samples from group E1 and group E2.**

| Number | Metabolite            | $\delta$ ( <sup>1</sup> H shift (ppm)/Multiplicity/Coupling constant(HZ)) |
|--------|-----------------------|---------------------------------------------------------------------------|
| 1      | Lipid                 | 0.84(m)                                                                   |
| 2      | Isoleucine            | 0.94(t, 7.4)<br>1.01(d, 7.0)                                              |
| 3      | Leucine               | 0.96(d)<br>3.73(m)                                                        |
| 4      | Valine                | 0.99(d, 7.1)<br>1.05(d, 7.0)                                              |
| 5      | Lactate               | 1.33(d, 6.9)<br>4.12(q, 6.9)                                              |
| 6      | Alanine               | 1.48(d, 7.3)<br>3.77(m)                                                   |
| 7      | Acetate               | 1.93(s)                                                                   |
| 8      | N-acetyl-glycoprotein | 2.04(s)                                                                   |
| 9      | Glutamate             | 2.08(m)                                                                   |
| 10     | Glutamine             | 2.14(m)<br>2.45(m)                                                        |
| 11     | Citrate               | 2.54(d, 16.1)<br>2.65(d, 16.2)                                            |
| 12     | Creatine              | 3.05(s)                                                                   |
| 13     | Carnitine             | 3.21(s)                                                                   |
| 14     | Choline Phosphate     | 3.22(s)                                                                   |
| 15     | Trimethylamine oxide  | 3.26(m)                                                                   |

|    |                  |                              |
|----|------------------|------------------------------|
| 16 | Betaine          | 3.27(m)<br>3.89(s)           |
| 17 | Acetoacetic acid | 3.49(s)                      |
| 18 | Glycine          | 3.57(s)                      |
| 19 | Glycerol         | 3.67(m)<br>3.78(m)           |
| 20 | Glucose          | 5.24(d, 3.7)<br>4.64(d, 8.0) |
| 21 | Tyrosine         | 6.90(m)<br>7.19(m)           |
| 22 | Histidine        | 7.10(s)                      |

s: singlet; d: doublet; t: triplet; q: quartet; m: multiplet; dd: doublet of doublet.

**Table S4**  
**PLS-DA analysis model parameter table**

| Grouping | Negative ion mode |                                   |                                   |                      | Positive ion mode |                                   |                                   |                      |
|----------|-------------------|-----------------------------------|-----------------------------------|----------------------|-------------------|-----------------------------------|-----------------------------------|----------------------|
|          | A                 | R <sup>2</sup> <sub>X</sub> (cum) | R <sup>2</sup> <sub>Y</sub> (cum) | Q <sup>2</sup> (cum) | A                 | R <sup>2</sup> <sub>X</sub> (cum) | R <sup>2</sup> <sub>Y</sub> (cum) | Q <sup>2</sup> (cum) |
| E/C      | 3                 | 0.477                             | 0.999                             | 0.897                | 2                 | 0.242                             | 0.995                             | 0.754                |

A: the number of main components; R<sup>2</sup>: the explanatory rate of model variables to X or Y; Q<sup>2</sup>: the predictive ability of the model; the closer R<sup>2</sup><sub>Y</sub> and Q<sup>2</sup> are to 1, the more stable and reliable the model is; the model is stable and reliable when Q<sup>2</sup> is greater than 0.5

**Table S5**  
**OPLS-DA analysis model parameter table**

| Grouping | Negative ion mode |                                   |                                   |                      | Positive ion mode |                                   |                                   |                      |
|----------|-------------------|-----------------------------------|-----------------------------------|----------------------|-------------------|-----------------------------------|-----------------------------------|----------------------|
|          | A                 | R <sup>2</sup> <sub>X</sub> (cum) | R <sup>2</sup> <sub>Y</sub> (cum) | Q <sup>2</sup> (cum) | A                 | R <sup>2</sup> <sub>X</sub> (cum) | R <sup>2</sup> <sub>Y</sub> (cum) | Q <sup>2</sup> (cum) |
| E/C      | 1+2               | 0.477                             | 0.999                             | 0.817                | 1+1               | 0.242                             | 0.995                             | 0.796                |

A: the number of main components; R<sup>2</sup>: the explanatory rate of model variables to X or Y; Q<sup>2</sup>: the predictive ability of the model; the closer R<sup>2</sup><sub>Y</sub> and Q<sup>2</sup> are to 1, the more stable and reliable the model is; the model is stable and reliable when Q<sup>2</sup> is greater than 0.5

**Table S6**  
**Differential metabolite pathway analysis results obtained from rat myocardial samples through Met-PA**

| Pathway                                            | Total | Expected | Hits | Raw p   | FDR     | Impact  |
|----------------------------------------------------|-------|----------|------|---------|---------|---------|
| Linoleic acid metabolism                           | 5     | 0.08284  | 2    | 0.00282 | 0.2148  | 1       |
| Arginine metabolism                                | 14    | 0.23194  | 2    | 0.01365 | 0.39832 | 0.07614 |
| Amino sugar and nucleotide sugar metabolism        | 37    | 0.61299  | 3    | 0.02228 | 0.39832 | 0.07043 |
| Niacin and Niacinamide metabolism                  | 15    | 0.24851  | 2    | 0.02473 | 0.39832 | 0.1943  |
| Pyrimidine metabolism                              | 39    | 0.64612  | 3    | 0.02963 | 0.39832 | 0.17143 |
| Biosynthesis of neomycin, kanamycin and gentamicin | 2     | 0.03314  | 1    | 0.02963 | 0.39832 | 0       |
| Fructose and mannose metabolism                    | 18    | 0.29821  | 2    | 0.03329 | 0.39832 | 0.12422 |
| Biosynthesis of Pantothenic Acid and CoA           | 19    | 0.31478  | 2    | 0.03937 | 0.39832 | 0       |
| Beta-alanine metabolism                            | 21    | 0.34791  | 2    | 0.04664 | 0.42614 | 0       |
| Biosynthesis of unsaturated fatty acids            | 36    | 0.59642  | 2    | 0.1179  | 0.82529 | 0       |
| Glycerophospholipid metabolism                     | 36    | 0.59642  | 2    | 0.1179  | 0.82529 | 0.11182 |
| Arachidonic acid metabolism                        | 36    | 0.59642  | 2    | 0.1179  | 0.82529 | 0.33292 |
| Aminoacyl-tRNA biosynthesis                        | 48    | 0.79523  | 2    | 0.18753 | 1       | 0       |
| Alpha-linolenic acid metabolism                    | 13    | 0.21537  | 1    | 0.19592 | 1       | 0       |
| Histidine metabolism                               | 16    | 0.26508  | 1    | 0.23559 | 1       | 0       |
| Starch and sucrose metabolism                      | 18    | 0.29821  | 1    | 0.26098 | 1       | 0.13851 |
| Pentose phosphate pathway                          | 21    | 0.34791  | 1    | 0.29756 | 1       | 0.18501 |
| Galactose metabolism                               | 27    | 0.44732  | 1    | 0.36557 | 1       | 0       |
| Alanine aspartate and glutamic acid                | 28    | 0.46388  | 1    | 0.37627 | 1       | 0.22356 |
| Inositol phosphate metabolism                      | 30    | 0.49702  | 1    | 0.39716 | 1       | 0       |
| Arginine and proline metabolism                    | 38    | 0.62956  | 1    | 0.47419 | 1       | 0.05786 |
| Biosynthesis of primary bile acids                 | 46    | 0.76209  | 1    | 0.54172 | 1       | 0       |
| Metabolic degradation of fatty                     | 39    | 0.64612  | 1    | 0.48312 | 1       | 0       |
| Tyrosine metabolism                                | 42    | 0.69583  | 1    | 0.50907 | 1       | 0.02463 |
| Biosynthesis of fatty acids                        | 47    | 0.77866  | 1    | 0.54955 | 1       | 0       |
| Purine metabolism                                  | 66    | 1.09342  | 1    | 0.67608 | 1       | 0.01334 |

Total: the total number of compounds in the pathway; Expected: the expected value; Hits: the number of accurate matches in the uploaded marker data; Raw P: the original P value obtained through the analysis of the pathway score map; FDR: the error trigger rate; Impact: obtained through topological analysis Out-of-path influence value.

**Table S7****KEGG ID of potential metabolic markers (<http://www.genome.jp/kegg/compound/>) <sup>[52]</sup> <sup>[53]</sup>**

| <b>Metabolites</b>                               | <b>KEGG ID</b> | <b>Metabolites</b>                             | <b>KEGG ID</b> |
|--------------------------------------------------|----------------|------------------------------------------------|----------------|
| Linoleic acid                                    | C01595         | D-mannose 1-phosphate                          | C00636         |
| 1-Stearoyl-2-oleoyl-sn-glycerol 3-phosphocholine | C00157         | D-Mannose                                      | C00159         |
| Nicotinamide                                     | C00153         | Uracil                                         | C00106         |
| L-Aspartate                                      | C00049         | L-Arginine                                     | C00062         |
| Thymidine                                        | C00214         | Cytidine monophosphate N-acetylneuraminic acid | C00128         |
| Thymine                                          | C00178         | Phosphatidylcholine                            | C00157         |



**Figure S1**

**Overlapping TIC spectra of negative and positive ion modes of QC samples**

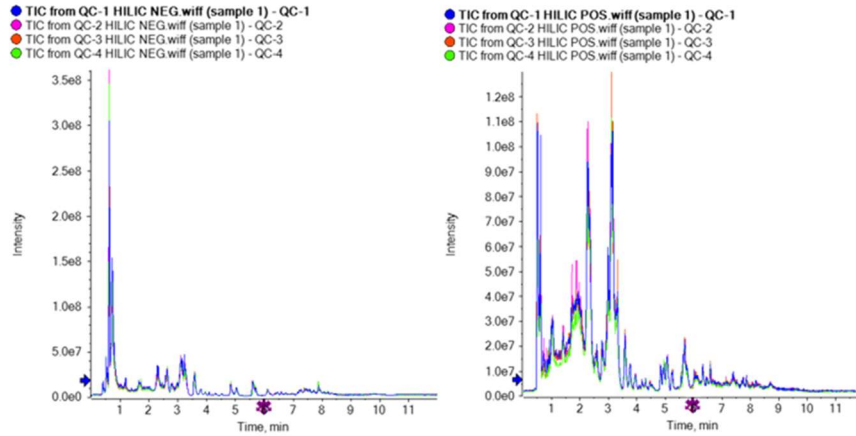

**Figure S2**

**Hotellings T2 diagram in negative and positive ion mode of the sample**

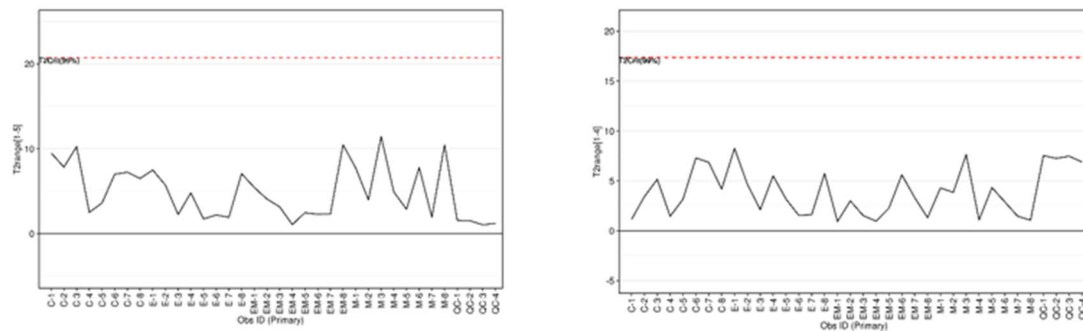

**Figure S3**

**Acute high-intensity exercise metabolic pathways constructed by Met-PA database**

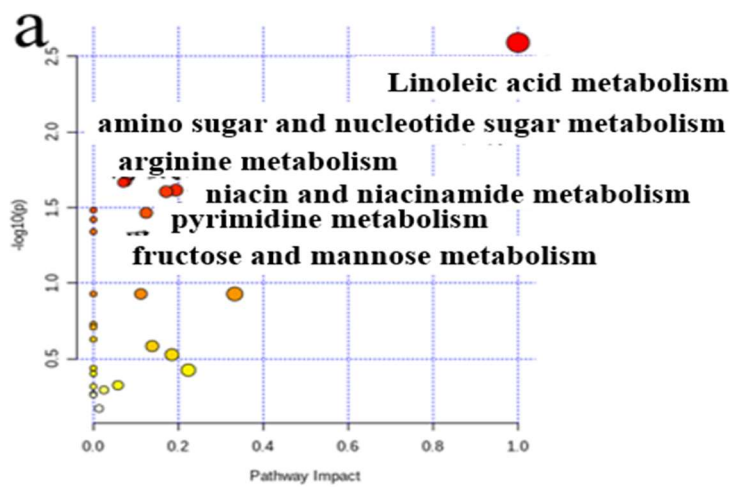

The abscissa pathway impact is the importance value of the metabolic pathway obtained by

topological analysis, and the ordinate  $-\log P$  is the significance level of the metabolic pathway enrichment analysis; the greater the pathway impact and  $-\log P$  value are, the higher the correlation of the metabolic differences between different groups is, the bigger the circle is.

**Figure S4**

**Assessment of the diagnostic power of receiver operating characteristic curves for the differential metabolites acute high-intensity exercise.**

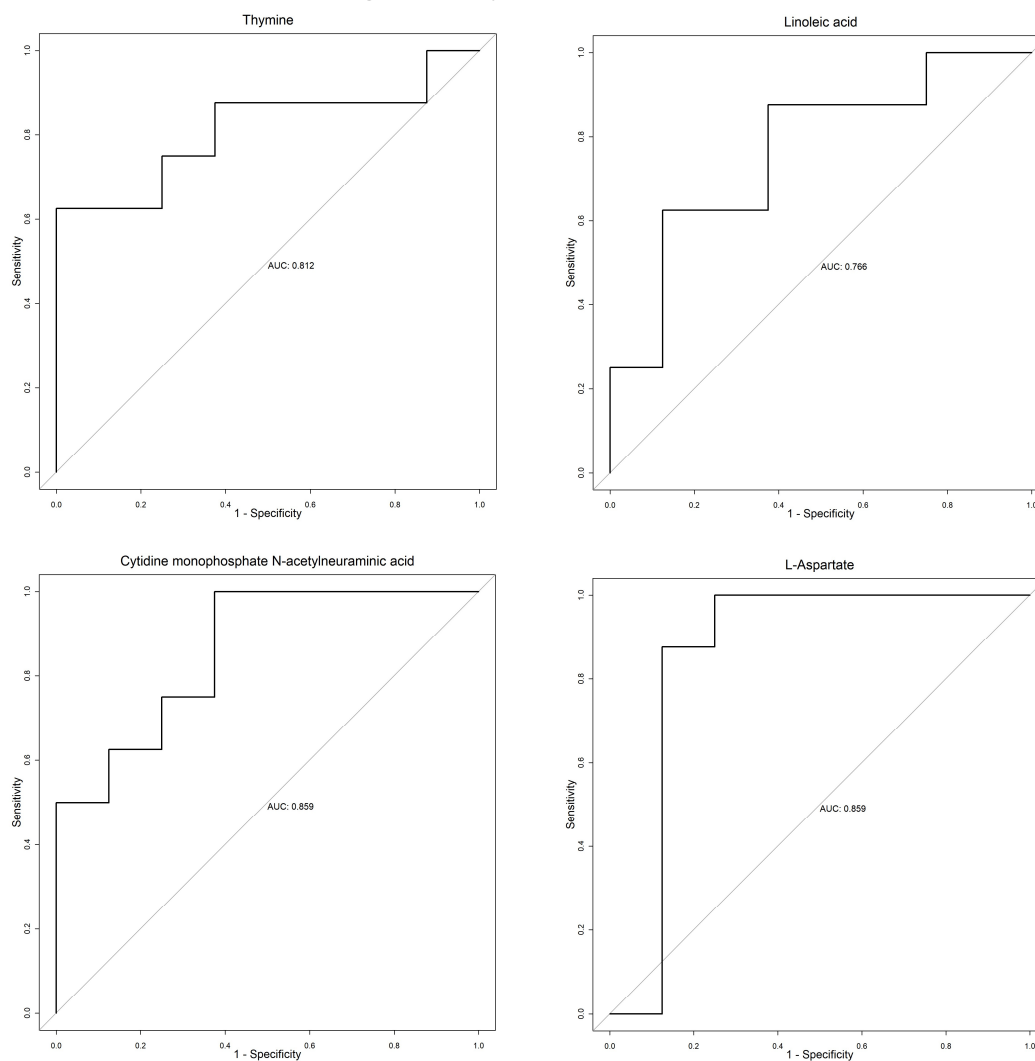

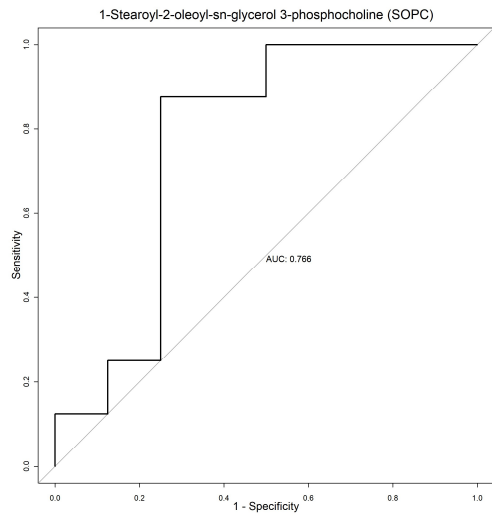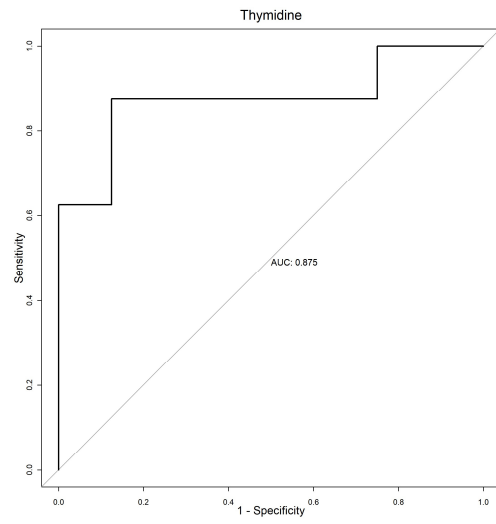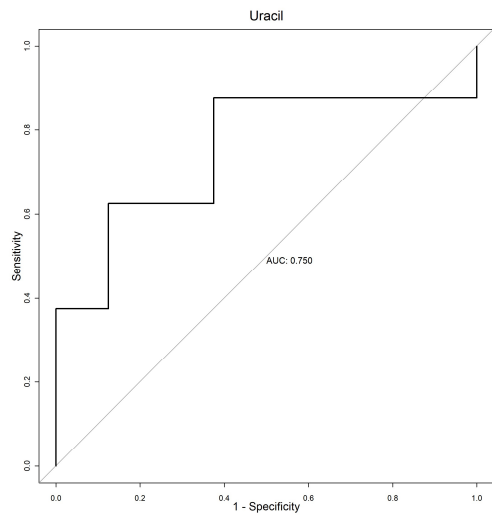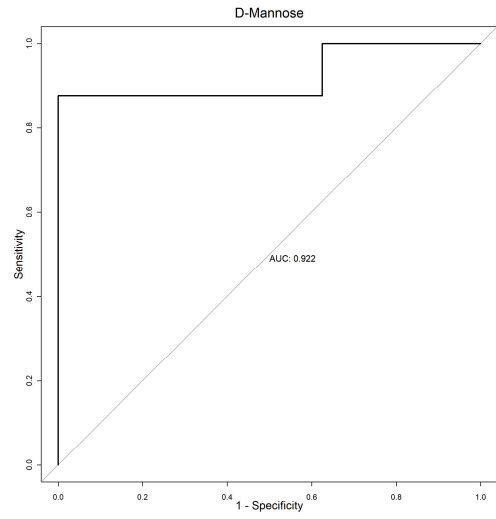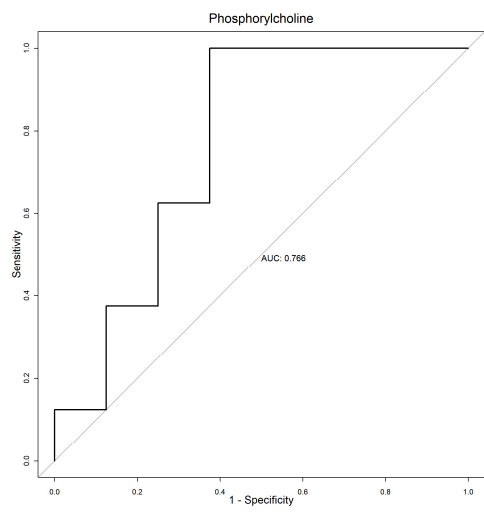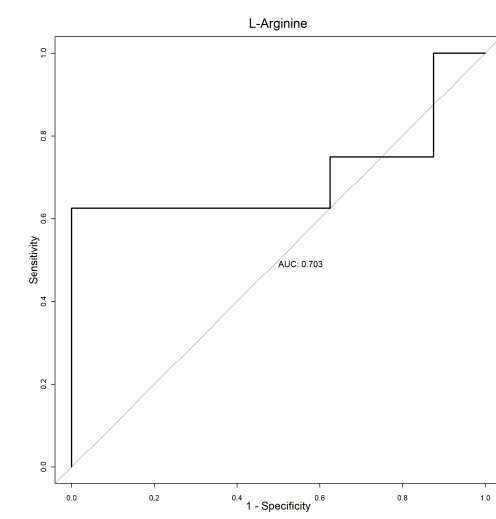

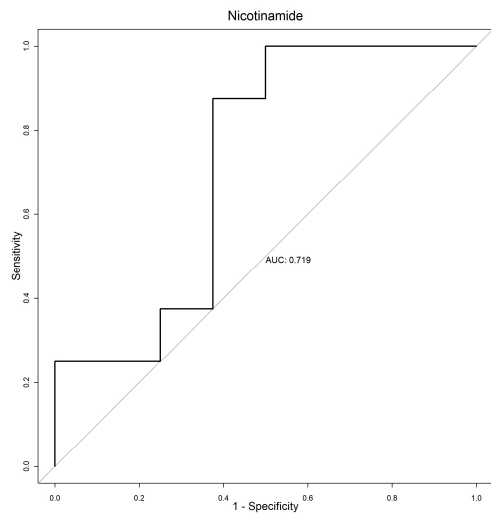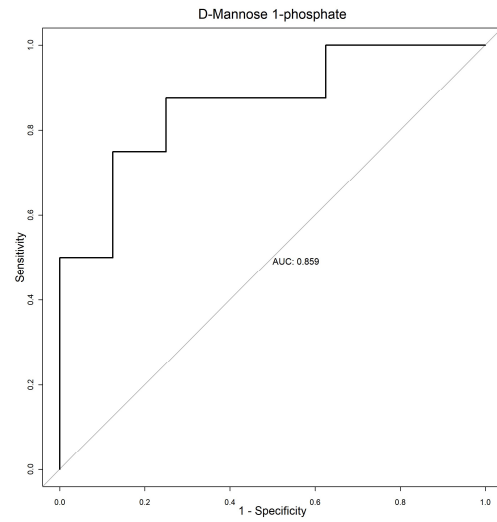

The area under the ROC curve (AUC) can represent the diagnostic effect of markers, and the closer the AUC is to 1, the better the diagnostic effect.  $AUC > 0.9$ , high accuracy;  $0.7 < AUC < 0.9$ , some accuracy;  $0.5 < AUC < 0.7$ , low accuracy;  $AUC \leq 0.5$ , no diagnostic value.
